1 **Prototyping of a lateral flow assay based on monoclonal antibodies for**  
2 **detection of *Bothrops* venoms**

3

4 Cecilie Knudsen<sup>1,2,3\*</sup>, Jonas A. Jürgensen<sup>3</sup>, Pelle D. Knudsen<sup>3</sup>, Irina Oganessian<sup>4</sup>, Julian A.  
5 Harrison<sup>4</sup>, Søren H. Dam<sup>1,3</sup>, Aleksander M. Haack<sup>1,3</sup>, Rasmus U. W. Friis<sup>1,3</sup>, Selma B.  
6 Belfakir<sup>1,3</sup>, Georgina M. S. Ross<sup>3</sup>, Renato Zenobi<sup>4</sup>, Andreas H. Laustsen<sup>1,3\*</sup>

7

8 <sup>1</sup>Department of Biotechnology and Biomedicine, Technical University of Denmark, Kongens  
9 Lyngby, Denmark

10 <sup>2</sup>BioPorto Diagnostics A/S, Hellerup, Denmark

11 <sup>3</sup>VenomAid Diagnostics ApS, Kongens Lyngby, Denmark

12 <sup>4</sup>Department of Chemistry and Applied Biosciences, ETH Zürich, Zürich, Switzerland

13

14

15

16

17 **Address for correspondence:**

18 Cecilie Knudsen

19 Ph.D. student

20 Department of Biotechnology and Biomedicine

21 Technical University of Denmark

22 DK-2800 Kgs. Lyngby, Denmark

23 [\\*cecknu@dtu.dk](mailto:*cecknu@dtu.dk)

24

25 Dr. Andreas H. Laustsen

26 Professor and Center Director

27 Department of Biotechnology and Biomedicine

28 Technical University of Denmark

29 DK-2800 Kgs. Lyngby, Denmark

30 [\\*ahola@bio.dtu.dk](mailto:*ahola@bio.dtu.dk)

31

32 **Key words:** Snakebite envenoming, diagnostics, lateral flow assay, neglected tropical diseases.

33

## 34 **Abstract**

### 35 Background:

36 Brazil is home to a multitude of venomous snakes, perhaps the most medically relevant of  
37 which belong to the *Bothrops* genus. *Bothrops spp.* are responsible for roughly 70% of all  
38 snakebites in Brazil, and envenomings caused by their bites can be treated with three types of  
39 antivenom: bothropic antivenom, bothro-lachetic antivenom, and bothro-crotalic antivenom.  
40 The choice in antivenom that is administered depends not only on its availability and how  
41 certain the treating physician is that the patient was bitten by a bothropic snake. The diagnosis  
42 of a bothropic envenoming can be made based on expert identification of a photo of the snake  
43 or based on a syndromic approach wherein the clinician examines the patient for characteristic  
44 manifestations of envenoming. This approach can be very effective but requires staff that has  
45 been trained in clinical snakebite management, which, unfortunately, far from all relevant staff  
46 has.

### 47 Results:

48 In this paper, we describe a prototype of the first lateral flow assay (LFA) capable of detecting  
49 venoms from Brazilian *Bothrops spp.* The monoclonal antibodies for the assay were generated  
50 using hybridoma technology and screened in sandwich enzyme-linked immunosorbent assays  
51 (ELISAs) to identify *Bothrops spp.* specific antibody sandwich pairs. The sandwich pairs were  
52 used to develop a prototype LFA that was able to detect venom from several different *Bothrops*  
53 *spp.* The limit of detection (LoD) of the prototype was evaluated using Brazilian *B. atrox* whole  
54 venom and was determined to be 8.0 ng/mL in spiked serum samples and 9.5 ng/mL in spiked  
55 urine samples, when using a portable reader, and < 25 ng/mL in spiked buffer when reading by  
56 eye.

### 57 Significance:

58 The work presented here serves as a proof of concept of a genus-specific venom detection kit,  
59 which could support physicians in diagnosing *Bothrops* envenomings. Although further  
60 optimization and testing is needed before the LFA can find clinical use, such a device could  
61 aid in decentralizing antivenoms in the Brazilian Amazon and help ensure optimal snakebite  
62 management for even more victims of this highly neglected disease.

## 63 **1 Introduction**

64  
65 Snakebite envenoming has plagued mankind since time immemorial, annually exacting a toll  
66 of 81,000-138,000 deaths and roughly six million disability-adjusted life-years (DALYs) [1,2].  
67 Brazil alone experiences approximately 26,000-30,000 snakebite envenomings per year, most  
68 of which are caused by *Bothrops* species, with the species *B. atrox* contributing with an  
69 especially high number of bites [3–5]. In addition to the *Bothrops* genus, bites from *Crotalus*  
70 *durissus*, *Lachesis muta*, and *Micrurus* spp. also occur, although to lesser extents [3]. The  
71 mainstay treatment of snakebite envenoming is antivenom, and, in Brazil, antivenoms are  
72 available at a genus and inter-genus level in the form of bothropic antivenom, crotalic  
73 antivenom, bothro-lachetic antivenom, bothro-crotalic antivenom, and elapidic antivenom. The  
74 corollary is that snakebite diagnosis in Brazil must be undertaken at the same level; healthcare  
75 providers must determine whether the bite was dry (i.e., a bite in which no venom was injected),  
76 whether it warrants antivenom administration, and, if so, which antivenom is appropriate when  
77 factoring in the snake that caused the bite [6,7]. This is usually accomplished via a syndromic  
78 approach, where the clinical manifestations of envenoming are compared to those associated  
79 with the different snake genera [6]. Unfortunately, some of the syndromes overlap, as the  
80 venoms of most Central and South American pit vipers are known to cause similar local effects  
81 and coagulopathies [6,8]. The venom of South American *Crotalus* species might be the  
82 exception, as they typically cause only mild local effects and have instead been shown to cause  
83 more severe systemic effects, including neurotoxicity [6]. The syndromes of envenomings

84 caused by *Bothrops* and *Lachesis* species are even more similar, thus further complicating  
85 correct diagnosis, but can in some cases be distinguished by the vagomimetic effects of lachetic  
86 venom on the gastrointestinal system. However, the presence of such effects cannot be used to  
87 confirm a lachetic envenoming, equally, their absence cannot be used to exclude it [6]. These  
88 overlapping syndromes can complicate matters for healthcare providers trying to identify the  
89 optimal treatment, especially as not all healthcare providers have received adequate training in  
90 clinical snakebite management [9]. This is unfortunate, as early and correct treatment has been  
91 shown to correlate with better patient outcomes for snakebite victims both in Brazil and abroad  
92 [10–14].

93           To facilitate early and correct treatment of snakebite envenoming in Brazil, the  
94 development of supportive diagnostic tools capable of distinguishing Brazilian pit viper bites  
95 at the same level at which clinical decisions are made (e.g., the genus level) could be beneficial.  
96 Such diagnostic tools could support efforts to secure faster treatment in the Amazon region,  
97 e.g., through antivenom decentralisation. Empowering healthcare providers at remote clinics  
98 to diagnose snakebites more easily and with higher precision enables them to choose the  
99 appropriate antivenom to treat envenomings [15]. In more metropolitan areas of Brazil,  
100 snakebite victims do not have to travel as far to reach a healthcare facility, and thus might  
101 present to the hospital before clinical manifestations of envenoming develop. In such scenarios,  
102 diagnostic tools might be able to speed up the diagnosis by providing healthcare workers with  
103 an idea of the offending snake before the venom has exerted its full toxic effects in the patient,  
104 and, as such, would allow healthcare workers to prepare the correct treatment regime early on.  
105 Finally, snakebite diagnostic tools might also help lower the incidence of misdiagnosis of  
106 snakebite patients. Here, we describe an attempt to develop such a snakebite diagnostic tool in  
107 the form of a lateral flow assay (LFA). LFAs are well-suited for the diagnosis of snakebite  
108 envenoming for several reasons. E.g., the widespread use of LFAs during the COVID-19

109 pandemic has demonstrated the feasibility of implementing such rapid diagnostics in both  
110 larger clinics, more remote settings, and even for home use by consumers. Moreover, LFAs are  
111 affordable, rapid, and user-friendly requiring no specialised equipment or training to operate  
112 them. Combined, this makes LFAs suitable for point of care (PoC) use, especially in primary  
113 care settings. Additionally, they can be mass produced for as little as 0.10-3.00 USD per test  
114 [16]. The affordability of these tests is especially relevant, as snakebite envenoming is  
115 associated with poverty and often occurs in regions with low-resource healthcare systems,  
116 meaning that the cost of treatment and diagnostics could easily become prohibitively high [17–  
117 19]. Finally, LFAs can be carried out in 5-20 minutes, making them appropriate diagnostics for  
118 an acute disease, such as snakebite envenoming. An additional advantage, is that LFAs rely on  
119 paper-based, disposable materials, making them relatively sustainable compared to diagnostics  
120 requiring more plastic components and/or harmful chemicals (e.g., enzyme-linked  
121 immunosorbent assays, abbreviated ELISAs). In this work, specifically, we have developed a  
122 prototype sandwich LFA using monoclonal antibodies capable of detecting venom from  
123 multiple Brazilian *Bothrops* species without cross-reacting with venoms from other Brazilian  
124 vipers. If taken into clinical development, such a tool could support clinical diagnosis and  
125 decision-making regarding treatment, thereby contributing to more snakebite patients in Brazil  
126 receiving the antivenom most appropriate for their envenoming as early as possible.

127

## 128 **2 Materials & Methods**

129

### 130 **2.1 Immunisation**

131

132 Lyophilised whole venom from *Bothrops atrox* (a specimen from Brazil, Latoxan, L1210A)  
133 was reconstituted in a sterile 0.9% saline solution to a final concentration of 1 mg/mL. Either  
134 5 or 10 µg venom, depending on the protocol, were mixed with aluminium hydroxide at a ratio  
135 of 1 mg aluminium hydroxide per 25 µg venom, in a solution of 0.05% methiolate, 50%

136 Adjuvant P (Gerbu, 3111.6001), and 0.9% saline water to a volume of 100  $\mu$ L to create an  
137 immunisation mixture. Immunisation mixtures were injected subcutaneously into four Naval  
138 Medicinal Research Institute (NMRI) mice: Two mice were injected with 5  $\mu$ g venom, and two  
139 were injected with 10  $\mu$ g venom. The mice were injected on days 1, 14, and 28, and they were  
140 bled on days 25 and 38 by taking a sample of 100  $\mu$ L blood from the jaw of each mouse and  
141 transferring it to tubes containing EDTA. Subsequently, 200  $\mu$ L 0.9% saline solution was added  
142 to the blood sample and the solution was centrifuged at 2,000 g for five minutes at room  
143 temperature, enabling the extraction of 250  $\mu$ L plasma, which was tested in ELISA as described  
144 below to monitor antibody development. On day 42, the animals received an immunisation  
145 boost consisting of 20  $\mu$ g whole venom dissolved in 0.9% saline to a volume of 100  $\mu$ L,  
146 injected intravenously.

147

## 148 **2.2 Bleed screenings**

149

150 Clear 96-well plates (Thermo Scientific, MaxiSorp, 439454) were coated with 100  $\mu$ L/well of  
151 1000 ng/mL whole venom from either *B. atrox*, *L. m. muta*, or *C. d. terrificus* dissolved in  
152 carbonate buffer (made from tablets as per the manufacturer's instructions, Medicago, 09-  
153 8922). The plates were incubated overnight at 4 °C or at ambient temperature and shaken at  
154 300 rpm for two hours, before being washed thrice with washing buffer (Ampliqon Laboratory  
155 Reagents, AMPQ40825.5). Afterwards, 110  $\mu$ L of mouse plasma diluted 1:55 in dilution buffer  
156 (10 mM phosphate, 140 mM NaCl, 0.5% w/v BSA, 0.0016% w/v phenol red, 0.05% v/v  
157 Tween-20, 0.1% v/v ProClin 950, pH 7.4) were added to each well. The plates were left shaking  
158 at 300 rpm for 1 hour, and then washed thrice with washing buffer. Next, 100  $\mu$ L of a 1:1000  
159 dilution of horseradish peroxidase (HRP)-conjugated, polyclonal, rabbit anti-mouse antibody  
160 (Dako, P0260) in dilution buffer (final concentration 1.3 ng/mL) was added to each well. The  
161 plates were left shaking at 300 rpm for 1 hour and subsequently washed thrice with washing

162 buffer. Then, 100  $\mu$ L of 3,3', 5,5' tetramethylbenzidine (TMB) One substrate (Eco-Tek, 4380-  
163 12-15) were added to each well, and the plates were left in complete darkness for 12 minutes,  
164 before 100  $\mu$ L of 0.5 M sulphuric acid were added to all wells to stop the reaction. The  
165 absorbance was measured at 450 nm and 620 nm on a Thermo Multiscan Ex plate reader.

166

### 167 **2.3 Cloning and hybridoma generation**

168

169 On day 45 of the immunisation schedule, the mice were sacrificed, and their spleens were  
170 extracted. The spleens were reduced to a single-cell-suspension with a mortar and pestle and  
171 were immediately mixed with SP2/0-AG14 myeloma cells and a PEG solution to fuse the B  
172 cells from the spleen with the myeloma cells. The resulting cells were spread into 96-well  
173 microtiter plates and grown in HAT medium for 7-10 days to select successfully fused cells.  
174 Culture supernatant from the different wells were tested with ELISA as described above, with  
175 the exceptions that an IgG-specific HRP-conjugated antibody (Merck, AP127P) was used for  
176 detection, and instead of mouse plasma, 1:50 and 1:100 dilutions of supernatant from the  
177 hybridoma growth media were used. The cell cultures corresponding to wells with positive  
178 ELISA signals for *B. atrox* venom and negligible signals for *C. d. terrificus* and *L. m. muta*  
179 venom were selected for cloning (other signal combinations were also chosen for  
180 completeness). These cells were transferred to HT medium and cultured further. The cells were  
181 then sequentially diluted in 96-well microtiter plates and tested with ELISA as described above,  
182 until wells with single cells were identified. These monoclonal cell lines were expanded and  
183 used in future experiments.

184

### 185 **2.4 Antibody purification**

186

187 NaCl was added to antibody-containing hybridoma culture supernatant to a final concentration  
188 of 2.5 M. After the salt was dissolved, half a teaspoon of Celpure P65 (Honeywell, 525235)

189 was added, and the culture supernatant was filtered through a 0.45 µm filter (Durapore®  
190 Membrane Filters 0.45 µm, HVLP04700). An ÄktaPrimePlus system was washed with  
191 ultrapure water to remove air in the tubing. The system was then primed with filtered culture  
192 supernatant, and the purification procedure was started (rProtein A sepharose Fast Flow (GE  
193 healthcare: 17-1279-03)), and the antibodies were purified.

194

## 195 **2.5 Cross-reactivity screenings**

196

197 The antibody binding profiles were investigated by screening the antibodies in ELISA against  
198 whole venom from *B. atrox*, *L. m. muta*, and *C. d. terrificus*. Antibodies that recognised only  
199 *B. atrox* venom were screened in ELISA against a panel of 21 venoms from the following  
200 species: *B. alternatus*, *B. asper*, *B. atrox* (Brazil), *B. atrox* (Columbia), *B. atrox* (Suriname), *B.*  
201 *jararaca*, *B. jararacussu*, *B. leucurus*, *B. mattogrossensis*, *B. moojeni*, *B. neuwiedi diporus*, *B.*  
202 *neuwiedi neuwiedi*, *B. pauloensis*, *C. adamanteus*, *C. atrox*, *C. d. terrificus*, *C. horridus*, *C.*  
203 *scutulatus scutulatus*, *C. simus*, *L. melanocephala*, and *L. m. muta* the venoms used in this  
204 study are summarised in the **Supplementary Information (SI) Table S1**. The ELISAs were  
205 carried out as described for the bleed screenings, with the exception that 100 µL/well purified  
206 antibodies in dilution buffer at 1000 ng/mL were used instead of mouse serum. Later, these  
207 cross-reactivity screenings were repeated with sandwich ELISAs and LFAs, using the  
208 protocols described below. Additionally, the following venoms were screened with LFA:  
209 *Agkistrodon bilineatus howard gloydi*, *Atropoides mexicanus*, *A. picadoi*, *B. andianus*, *B.*  
210 *barnetti*, *B. castelneudi*, *B. chloromelas*, *B. hyoprurus*, *Bothriechis lateralis*, *B. microphthalmus*,  
211 *B. peruviansis*, *B. pictus*, *B. schlegeli*, *Cerrophidion sasai*, *L. stenophrys*, *Porthidium nasutum*,  
212 and *P. ophryomegas*.

213

## 214 **2.6 Biotinylation of antibodies**

215



216 The antibodies were buffer exchanged into carbonate buffer using Nap5 columns (Illustra, GE  
217 Healthcare, 17085302) according to the manufacturer's protocol. The antibodies were eluted  
218 from the Nap5 columns with 1.5 mL of carbonate buffer, and the eluate was collected into a  
219 Vivaspin 6 50 kDa MWCO column (Sartorius, V10631), which was centrifugated at 2,113 g  
220 for five minutes to concentrate the antibodies. The antibody concentration was determined  
221 using an Eppendorf BioPhotometer model 6131. Biotin-N-hydroxysuccinimide (Sigma-  
222 Aldrich, H1759-5mg) was dissolved in DMSO to a concentration of 0.4 µg/mL. Biotin-N-  
223 hydroxysuccinimide was added to the buffer exchanged antibodies at a ratio of 55 µg Biotin-  
224 N-hydroxysuccinimide per mg antibody, and the samples were vortexed immediately for one  
225 minute, before being left with end-over-end rotation for two hours. The reaction was stopped  
226 through addition of 50 µL 1 M Tris per 2.5 mL sample. The antibodies were buffer exchanged  
227 into 0.14 M PBS with 0.1% NaN<sub>3</sub>, concentrated, and their concentrations were measured again.  
228 The biotinylated antibodies were evaluated in ELISA as described previously, with the  
229 exception that antibody dilution series in the range 0.5-500 ng/mL were made of the  
230 biotinylated and unbiotinylated antibodies, respectively, using dilution buffer. The biotinylated  
231 and unbiotinylated antibodies in the dilution series were detected with different reagents: The  
232 biotinylated antibodies were detected with HRP-conjugated streptavidin (for two replicate  
233 dilution series) and with a 1:1000 dilution of HRP-conjugated anti-mouse antibody (Dako,  
234 P0260) (for another two replicate dilution series), while the unbiotinylated antibodies were  
235 only detected with the 1:1000 dilution of the HRP-conjugated anti-mouse antibody (also for  
236 two replicate dilution series). The HRP-conjugated streptavidin used for detection was  
237 prepared by reconstituting lyophilised HRP-conjugated streptavidin (KemEnTec, 14-30-00) in  
238 50% glycerol and leaving it with end-over-end rotation for at least 90 minutes, before being  
239 diluted 1:5000 in HRP-StabilPlus buffer (KemEnTec, 4530A).

240

## 241 **2.7 Sandwich pair screening**

242  
243 100  $\mu$ L of 1000 ng/mL of unbiotinylated antibodies in carbonate buffer were coated in  
244 individual wells on 96-well plates (Thermo Scientific, MaxiSorp, 439454) and incubated at 4  
245  $^{\circ}$ C overnight or for two hours at ambient temperature and 300 rpm. The plates were washed  
246 thrice with washing buffer, 100  $\mu$ L of 1000 ng/mL whole venom dissolved in dilution buffer  
247 were added to each well, and the plates were incubated for another hour at ambient temperature  
248 and 300 rpm. The plates were washed thrice, and 100  $\mu$ L of 1000 ng/mL biotinylated antibody  
249 in dilution buffer were added to each well, before the plates were incubated and washed again  
250 thrice. From here on, the protocol is identical to those previously described with HRP-  
251 conjugated streptavidin used as a detection reagent.

252

## 253 **2.8 Gold-conjugation of antibodies**

254  
255 The antibodies were buffer exchanged into ultra-pure water, concentrated, and the  
256 concentration was measured as described above for biotinylations. The antibodies were gold-  
257 conjugated using 40 nm gold particles at 15 OD/mL from a Naked Gold Conjugation Kit  
258 (BioPorto Diagnostics, NGIB18) according to the manufacturer's protocols. In addition to the  
259 salt tests described in the manufacturer's protocol, the suitability of the gold-conjugated  
260 antibodies was also evaluated in terms of false positives by comparing the results of positive  
261 and negative samples on LFA strips (see below).

262

## 263 **2.9 Lateral Flow Assays**

264  
265 75  $\mu$ L running buffer (0.14 M PBS with 50 g/L BSA, 0.5% Tween-20, 0.1% ProClin 950) were  
266 added to a tube and mixed with 5  $\mu$ L 0.1 mg/mL biotinylated capture antibody (dissolved in  
267 running buffer), 5  $\mu$ L gold-conjugated detection antibody, and 15  $\mu$ L sample. The mixture was  
268 allowed to incubate for five minutes at room temperature. After 5 minutes, a commercially

269 available LFA strip (BioPorto Diagnostics, gRAD1-120) was inserted into the tube. The strip  
270 was then either read every 10 seconds for 15 minutes (kinetic measurements) or read once after  
271 15 minutes (point measurement) using a Cube Reader (ChemBio Diagnostics). Samples  
272 consisted of either running buffer, pooled human serum (Sigma-Aldrich, H4522-100mL), or  
273 pooled human urine (Lee Biosolutions, 991-03-P) spiked with whole venom. For the  
274 interference study, each interferant was diluted in the matrix (pooled human serum or pooled  
275 human urine) to the final concentration seen in **Error! Reference source not found.** The  
276 measurements were analysed in GraphPad Prism 9 (version 9.4.0) using a one-way ANOVA  
277 analysis followed by a post-hoc Dunnett analysis comparing each interferant mean to the mean  
278 of the control.

279

## 280 **2.10 Lyophilisation**

281

282 Lyoprotectant solutions were prepared, which consisted of 0.3% w/v of either BSA or casein  
283 and 5% w/v of either trehalose, sucrose, or mannitol, dissolved in ultrapure water. Gold-  
284 conjugated antibodies were dissolved in these solutions to a final concentration of 10% v/v  
285 along with biotinylated antibodies with a final concentration of 10 µg/mL. The mixtures were  
286 aliquoted 50 µL at a time into 0.5 mL tubes and lyophilized at -40 °C in a lyophiliser (Labogene  
287 Scanvac superior touch 55-80) for approximately 12 hours. After lyophilisation, the tubes were  
288 sealed and stored at 4 °C until use. For the stability studies, the samples were used the day after  
289 the lyophilisation.

290

## 291 **2.11 Sample preparation for native mass spectrometry**

292

293 *B. atrox* venom and antibody samples were fractionated and exchanged into 200 mM  
294 ammonium acetate by size exclusion chromatography (SEC) as previously described [20,21].  
295 These experiments were performed on a Superdex Increase 200 10/300 GL column (Cytiva,

296 Massachusetts, United States) pre-equilibrated with 200 mM ammonium acetate at the rate of  
297 0.5 mL/min. Samples were collected and stored at 4 °C until used. The concentration of toxins  
298 in the SEC fractions was not adjusted prior to mixing with the antibody.

299

## 300 **2.12 Native mass spectrometry**

301

302 All mass spectrometry (MS) experiments were performed on a SELECT SERIES cyclic IMS  
303 mass spectrometer (Waters, Manchester, U.K.), which was fitted with a 32,000 m/z quadrupole,  
304 equipped with an electron capture dissociation (ECD) cell (MSvision, Almere, Netherlands) in  
305 the transfer region of this mass spectrometer. Approximately 4 µL of sample were nano-  
306 sprayed from borosilicate capillaries (prepared in-house) fitted with a platinum wire. Spectra  
307 were acquired in positive ion mode, with the  $m/z$  range set to 50-8,000. Acquisitions were  
308 performed for five minutes at a rate of 1 scan per second. The operating parameters for the MS  
309 experiments were as follows: capillary voltage, 1.2 - 1.5 kV; sampling cone, 20 V; source  
310 offset, 30 V; source temperature, 28 °C; trap collision energy, 5 V; transfer collision energy, 5  
311 V; and Ion guide RF, 700 V. This instrument was calibrated with a 50:50 acetonitrile:water  
312 solution containing 150 µM caesium iodide (99.999%, analytical standard for HR-MS, Fluka,  
313 Buchs, Switzerland) each day prior to measurements.

314

## 315 **3 Results**

316

### 317 **3.1 Antibody discovery and characterisation**

318

319 Mice were immunised with whole venom from Brazilian *B. atrox* specimens. ELISAs on the  
320 plasma from the mice were used to confirm that venom-specific antibodies had been raised.  
321 Once the immunisation schedule had been completed, the mice were euthanised, and B cells  
322 were harvested from their spleens. Hybridoma cell lines were generated, screened for  
323 expression of antibodies specific to venom, and cloned to monoclonality. This resulted in 38

324 monoclonal cell lines expressing antibodies capable of recognising *B. atrox* venom. The 38  
325 resulting antibodies were screened in ELISAs against whole venom from *B. atrox*, *C. d.*  
326 *terrificus*, and *L. m. muta*, to identify antibodies that bind only to *Bothrops* venom, without  
327 cross-reacting to venoms from either of these two other medically relevant pit vipers. Out of  
328 these 38 antibodies, four bound only *B. atrox* venom (*B. atrox* signal > 3.0, other signals < 0.5).  
329 These four antibodies were screened in further ELISAs against a panel of 21 Latin American  
330 snake venoms (including the original three venoms), and three out of the four antibodies were  
331 selected, as they retained a binding profile where only *Bothrops* venoms elicited strong signals  
332 (*Bothrops* signal > 2.5, other signals < 0.5). The fourth antibody, conversely, was shown to  
333 also react with *C. horridus* venom (**Error! Reference source not found.**).

334           The antibodies that had been selected based on their binding profiles were  
335 biotinylated and screened against all 38 monoclonal antibodies in sandwich ELISAs to find the  
336 sandwich pairs necessary for the LFA. Our hypothesis was that only one sandwich pair  
337 component would need to have the desired genus specificity for the pair to be genus-specific.  
338 With the three selected detection antibodies, we found ten possible sandwich pairs that could  
339 detect *B. atrox* venom. All these pairs utilised the same detection antibody (antibody 86-14),  
340 while no sandwich partners were found for the other two detection antibodies. We subsequently  
341 investigated the binding profiles of these ten sandwich pairs against the panel of 21 venoms  
342 and confirmed that the binding profiles of the sandwich pairs reflected the binding profile of  
343 the genus-specific detection antibody (**Error! Reference source not found.**). Out of the ten  
344 sandwich pairs, four seemed especially interesting due to the combination of their recognition  
345 of venoms from multiple *Bothrops* species and the comparatively high signals they yielded in  
346 the sandwich ELISAs (**Error! Reference source not found.**). These four pairs were selected  
347 for further evaluations in LFAs.

348

## 349 **3.2 LFA prototyping**

350

351 The four selected non-genus-specific capture antibodies were biotinylated as preparation for  
352 use in LFAs, and the genus-specific detection monoclonal antibody was conjugated to gold  
353 nanoparticles (AuNP-mAb). The gold-conjugation was carried out at ten different pHs, and the  
354 absorption spectra of each version of the conjugated antibody were investigated. Additionally,  
355 the blank signal (i.e., the test line signals of LFAs in which no antigen was added) of the  
356 different AuNP-mAbs were measured in LFAs to find the optimal conjugation conditions.  
357 Following successful conjugation, LFA prototypes were established for each of the four  
358 sandwich pairs using Generic Rapid Assay Device (gRAD) LFA strips [22]. The gRAD is a  
359 commercially available, universal sandwich LFA that is not antigen-specific. The gRAD's  
360 single test line is composed of biotin-binding proteins and its control line is immobilised anti-  
361 mouse antibodies. This generic configuration makes it possible to rapidly prototype LFAs, as  
362 long as the capture antibody is biotinylated and the detection antibody is murine. The gRAD-  
363 based prototypes were used to detect a 1000 ng/mL solution of whole venom from *B. atrox*  
364 (this concentration is higher than the expected levels detected after a bite [23,24], and was  
365 intended as a positive control), and the test line and control line intensities were quantified  
366 using a low-cost commercial LFA reader. Out of the four prototypes, the one relying on  
367 antibodies 86-14 and 86-11 provided the highest test line signal, so it was decided to keep  
368 working with this prototype. The prototype's signal-dependence on the antigen concentration  
369 was assessed by measuring a dilution curve consisting of LFA running buffer spiked with  
370 various concentrations of *B. atrox* whole venom. While there was a clear correlation between  
371 venom concentration and test line signal intensity, the correlation was not linear (see **Figure**  
372 **1A, Figure 1B and Error! Reference source not found.**). The prototype was also used to  
373 measure LFA running buffer spiked with higher concentrations (5,000 - 5,000,000 ng/mL) of  
374 *B. atrox* whole venom to assess whether the prototype is affected by the hook effect (also

375 known as prozone effect) (see **Figure 1C** and **Figure 1D**). The prototype appears to be  
376 influenced by high antigen concentrations, as at concentrations above 20,000 ng/mL, the test  
377 line signal starts decreasing, even as the antigen concentration increases. This reduction of test  
378 line intensity at high antigen concentrations is characteristic of the hook effect [25]. Finally,  
379 the visual (by naked eye) and digital (by low-cost reader) limit of detection (LoD) of the  
380 prototype was determined and it was assessed how this LoD might be influenced by the sample  
381 matrix. Therefore, LFA running buffer, pooled human serum, and pooled human urine were  
382 spiked with 0-20 ng/mL of *B. atrox* whole venom, and the test and control line signal intensities  
383 were measured. Linear regression was used to find the linear functions that best described the  
384 data. The LoDs were calculated using the formula  $LoD = 3.3 * (\sigma/S)$ , where  $\sigma$  is the standard  
385 deviation of the test line signal, S is the slope of the curve, and 3.3 is a constant [26]. The  
386 parameters used in the calculations and the resulting LoDs can be seen in **Table 1**, while the  
387 test line signals are plotted in **Figure 1E** and **Figure 1F**. Spiking LFA running buffer and urine  
388 with venom generally resulted in lower false positive signal (i.e., test line signal on tests in  
389 which no antigen was added) than did spiking serum with venom. However, the curve based  
390 on the serum samples had a steeper slope than the curves based on the LFA buffer and urine  
391 samples. The LoD was therefore determined to be lower in serum samples (8.0 ng/mL) than in  
392 urine samples (9.5 ng/mL) and LFA buffer samples (10.3 ng/mL). The visual LoD (i.e., the  
393 lowest antigen concentration that could be read by the naked eye) was slightly higher, i.e., a  
394 visual LoD of 25 ng/mL was comfortably achievable (**Error! Reference source not found.**),  
395 indicating that the test is usable even without any specialised LFA reader.

396

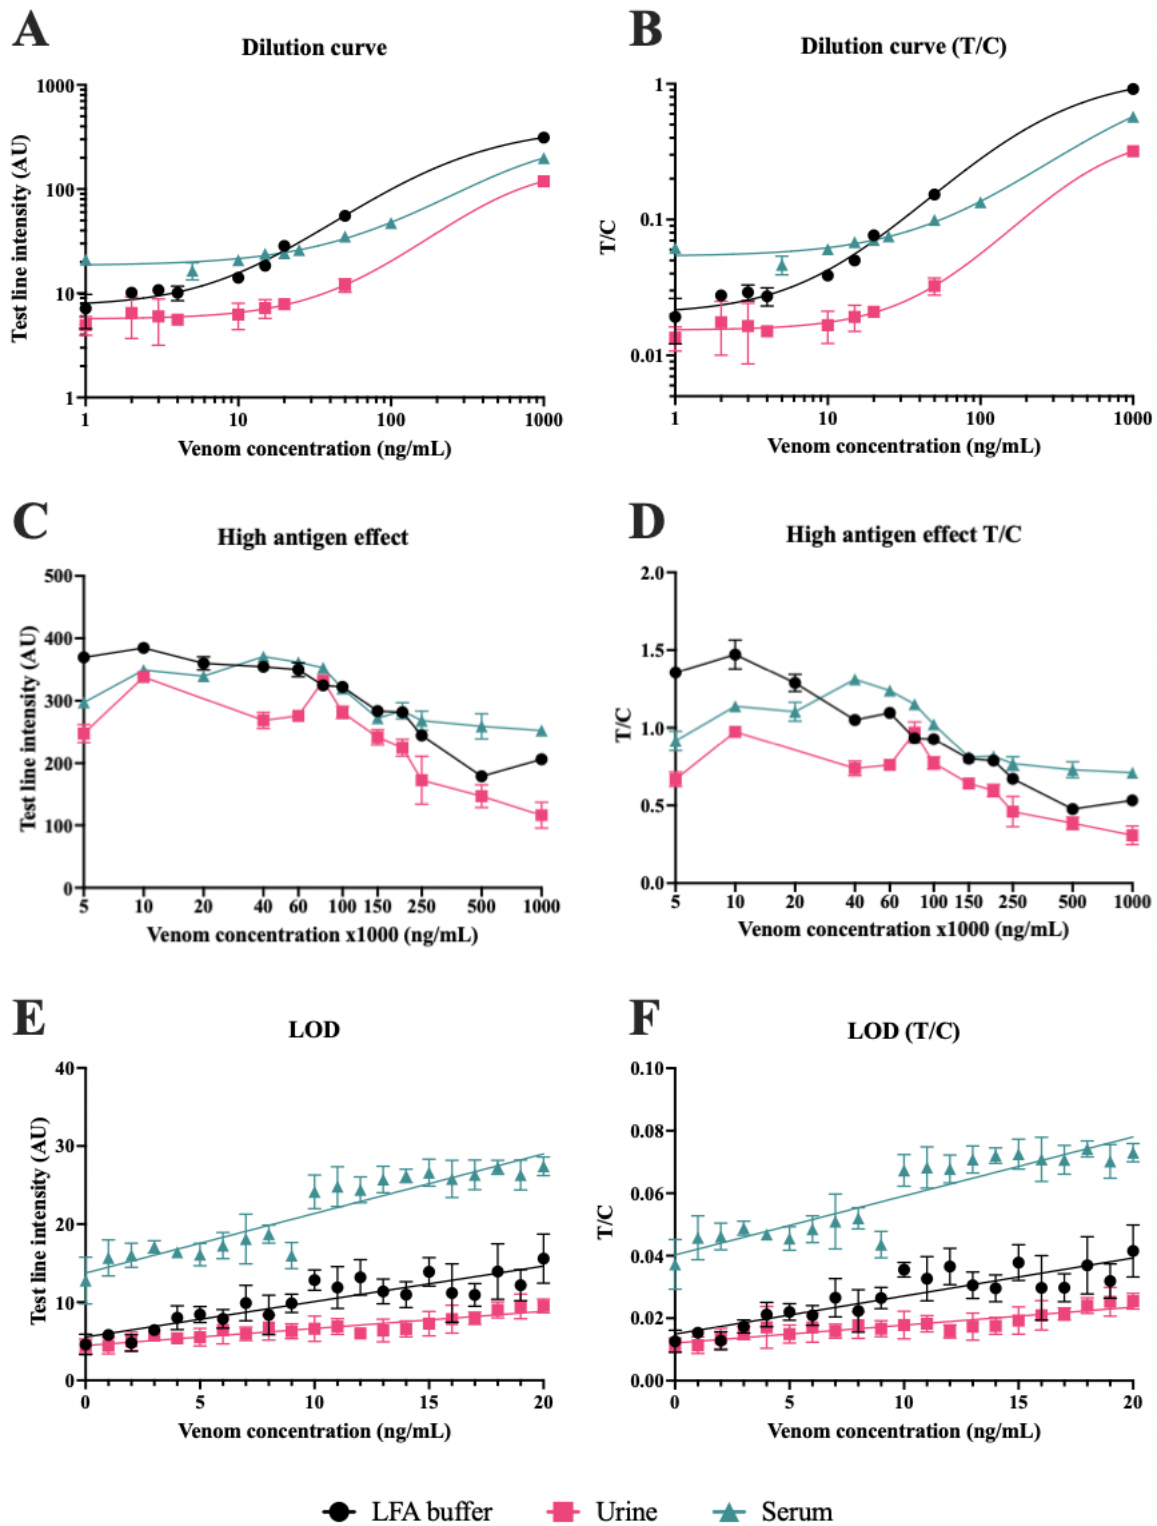

397

398 **Figure 1.** Dilution curves of sandwich pair 86-14 and 86-11 as measured with LFAs. A&B) B.

399 atrox whole venom was dissolved in LFA running buffer at various concentrations and

400 measured in duplicates in LFAs to assess the concentration-signal correlation of the test. Both

401 the test line intensities as quantified with a commercial reader and the test line intensity to



402 control line intensity (T/C) ratios are shown here. C&D) LFA running buffer was spiked with  
403 high concentrations of *B. atrox* whole venom and measured in triplicates in LFAs to assess the  
404 presence of hook effect. The concentrations displayed on the axis should be multiplied by 1,000  
405 to get the actual concentration. E&F) Low concentrations of *B. atrox* venom were dissolved in  
406 LFA running buffer, pooled human serum, and pooled human urine, respectively, and  
407 measured in six replicates in LFAs to assess the LoD of the test.

408

409 **Table 1.** Parameters used for LoD calculations.

| Sample matrix | Blank signal | Blank $\sigma$ | Intersection | S    | $\sigma$ | LoD (ng/mL) |
|---------------|--------------|----------------|--------------|------|----------|-------------|
| LFA buffer    | 4.61         | 1.31           | 5.60         | 0.45 | 1.40     | 10.3        |
| Urine         | 4.42         | 0.87           | 4.58         | 0.21 | 0.61     | 9.5         |
| Serum         | 12.77        | 3.00           | 13.82        | 0.76 | 1.83     | 8.0         |

410 Blank signal refers to the test line intensity when the LFA is used to test a sample not containing the target antigen.  
411 S is the slope of the curve, and  $\sigma$  is the standard deviation of the test line signal. Eight replicates were performed  
412 for the blank measurements, and six replicates were performed for all other measurements.

413

### 414 3.3 Antigen identification

415

416 To identify the antigens recognised by the sandwich pair, the antibodies 86-14 and 86-11 were  
417 screened against *B. atrox* venom proteins using electrospray ionisation mass spectrometry  
418 (ESI-MS) to look for binding partners. These mass spectra were acquired under ‘soft’  
419 ionisation conditions, which allow non-covalent interactions to be preserved and transferred  
420 into the gas phase. Prior to screening, *B. atrox* venom was fractionated by size exclusion  
421 chromatography (SEC) to separate the venom components by mass. This was done to generate  
422 venom protein mixtures, which were less complex than the whole venom, to make antigen  
423 identification easier, as well as to exchange the proteins into a spray solution that was

424 appropriate for ESI-MS. **Figure 2A** shows the SEC profile of the venom, which contained  
425 multiple protein peaks (labelled in the chromatogram), which corresponded to proteins of  
426 different masses. The size exclusion fractions for these peaks were mixed with the two  
427 antibodies in a 1:1 (volume:volume) ratio to screen for binding. Both 86-11 and 86-14  
428 antibodies only bound to venom proteins from SEC fraction four (elution volume 15-16 mL)  
429 of *B. atrox* venom. To better understand the nature of these antibody antigen interactions, 86-  
430 14 and 86-11 were titrated against *B. atrox* SEC fraction four. **Figure 2B & C** show the native  
431 mass spectra of both antibodies prior to mixing with the venom fraction, where the most  
432 abundant charge states were 24<sup>+</sup> and 25<sup>+</sup> for 86-11 and 86-14, respectively. **Figure 2D & E**  
433 shows the mass spectra of the antibodies mixed in a 1:1 (volume:volume) ratio with a diluted  
434 (one in five) *B. atrox* SEC fraction four. Within these spectra, two prominent charge state  
435 distributions were detected within the *m/z* region 5400 to 7600 for 86-11 and 86-14. The  
436 difference in masses between the charge state series corresponded to the antibodies complexed  
437 with a 23.3 kDa protein (168.1 kDa vs. 144.8 kDa for 86-11, and 169.1 kDa 146.5 kDa for 86-  
438 14). When mixed with the undiluted venom fraction, the most prominent charge state series  
439 have masses corresponding to the antibodies bound to 46.6 kDa of antigen (**Figure 2F & G**).  
440 Taken together, these titration experiments indicate that the antibodies are binding two 23.3  
441 kDa venom proteins. To further test these observations, ions corresponding to antibody  
442 complexes with two toxins were isolated and fragmented by tandem MS (MS/MS) and  
443 subjected to collisional energy to dissociate the antigens.

444

445

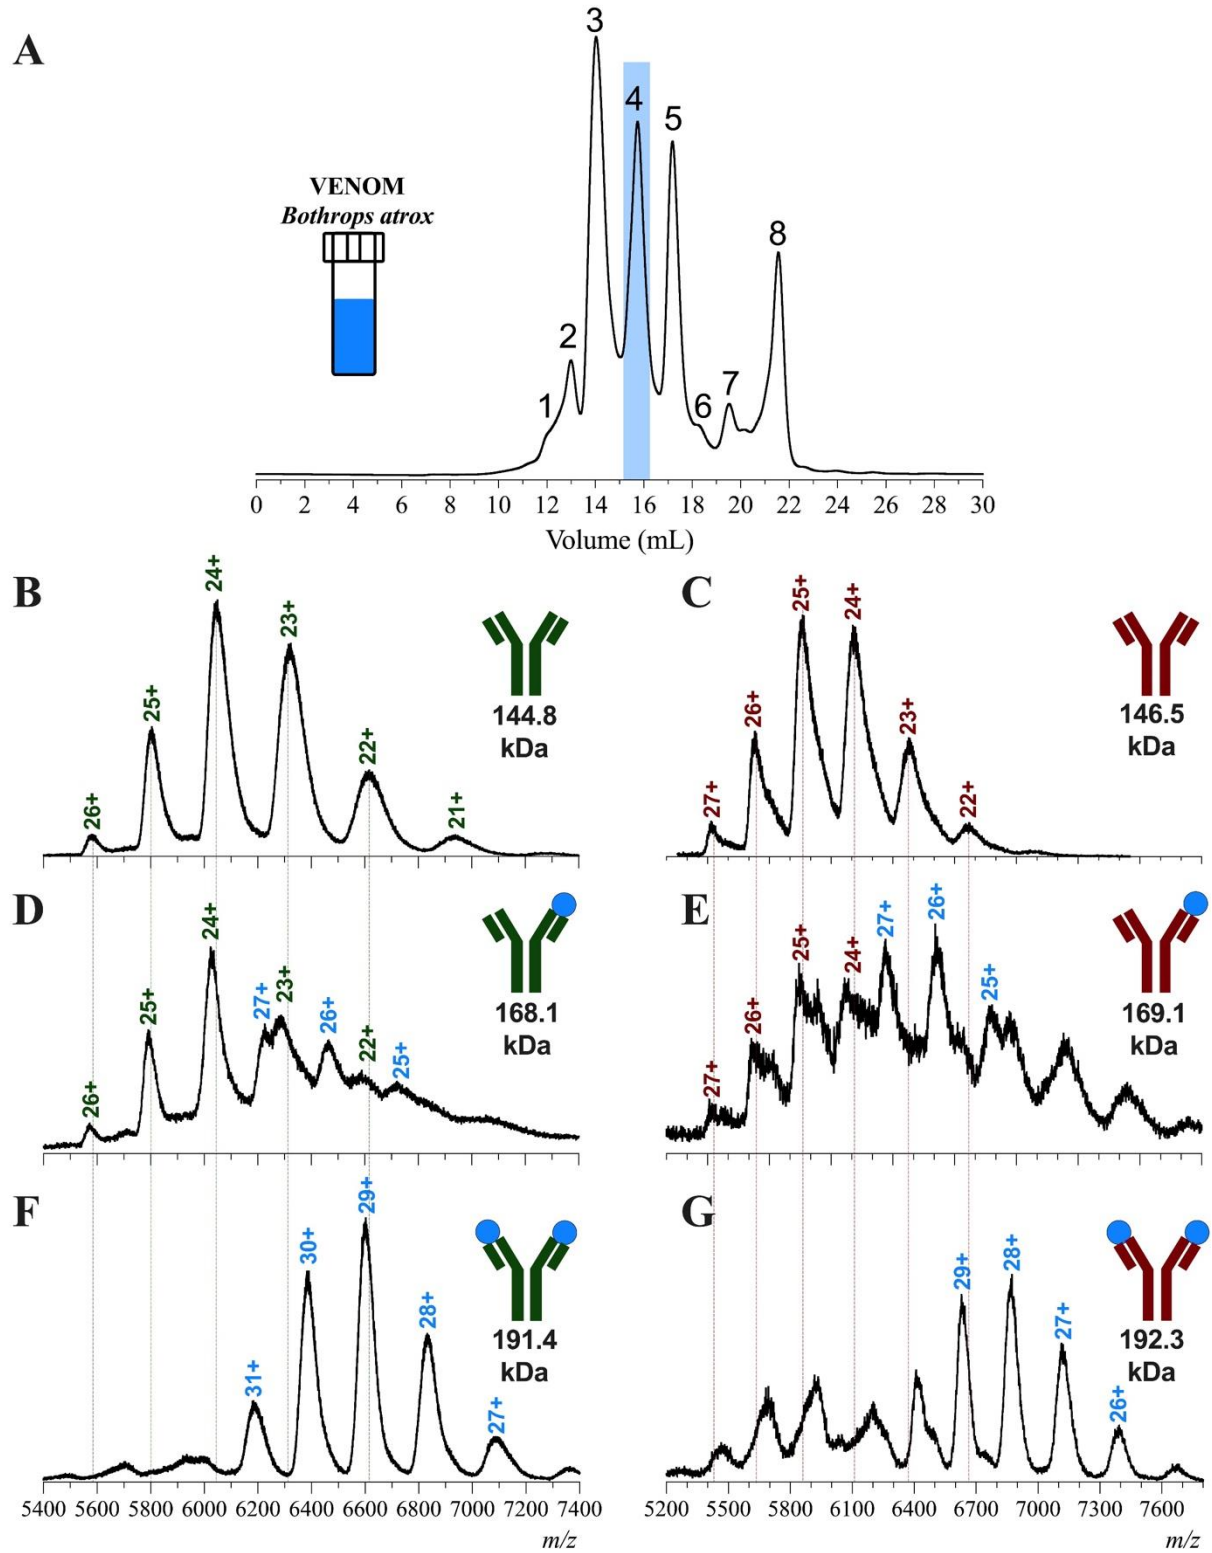

446

447 **Figure 2.** Size exclusion and Mass spectrometry for the titration of *B. atrox* venom against the

448 monoclonal antibodies, 86-11 and 86-14. A) The size exclusion chromatogram of the *B. atrox*

449 venom, with the peak corresponding to the antigen fraction highlighted in blue. Native mass

450 *spectra of B) antibody 86-11 (green) and antibody 86-14 (red), C) antibody 86-11 prior to*  
451 *mixing. The mass spectra for antibodies 86-14 and 86-11 mixed with the five times diluted (D*  
452 *& E, respectively) and undiluted (F & G, respectively) fraction from the SEC of B. atrox venom.*

453

454 For the MS/MS experiments, the 28<sup>+</sup> charge states of the antibody toxin complexes were  
455 isolated and subjected to collisional energy. This was done to dissociate the antigens from the  
456 antibody to accurately calculate their masses. **Figure 3** shows the MS/MS spectra of each  
457 antibody:toxin complex after the application of collisional energy. For both antibodies (**Figure**  
458 **3A & B**), the ejected protein from the complexes had the mass of 23.3 kDa. A negative control  
459 was included to check the fragmentation patterns of only the 86-11 and 86-14 antibodies  
460 (**Error! Reference source not found.**). The data from these spectra show that the only antigen  
461 ejected has a mass of 23.3 kDa, and that this mass did not correspond to the fragmentation of  
462 the antibody. Taken together, the ESI-MS data presented in **Figure 2** and **Figure 3** show that  
463 the antibodies bind specifically to the 23.3 kDa toxin twice. The masses of the ejected toxins  
464 are within the expected sequence mass range of type I snake venom metalloproteases.  
465 However, further experiments are required to confidently identify the antigen.

466

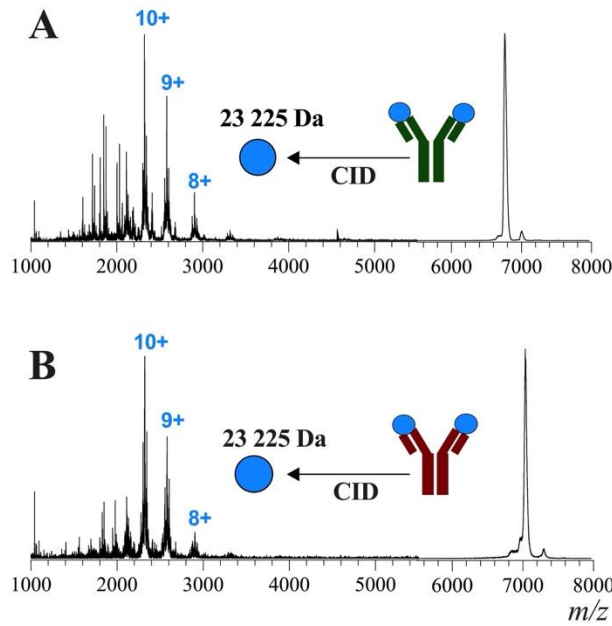

467

468 **Figure 3.** Tandem MS experiments for the antibody:(2)toxin complexes. Collision induced  
469 dissociation (CID) of antibody 86-11 (green) and antibody 86-14 (red) complexed with the  
470 antigens are shown in spectra A) and) B, respectively.

471

### 472 3.4 Assay characterisation

473

474 To further characterise the LFA, it was screened against the panel of 21 venoms used in the  
475 ELISAs, as well as an additional 24 venoms to determine which venoms were recognised (see  
476 **SI Table S1**). The results indicate that the assay is specific towards the venoms of *Bothrops*  
477 species from both Brazil and some of its neighbouring countries, while it cannot detect venoms  
478 from other viperids, such as *Crotalus* and *Lachesis* spp. (**Figure 4**).

479

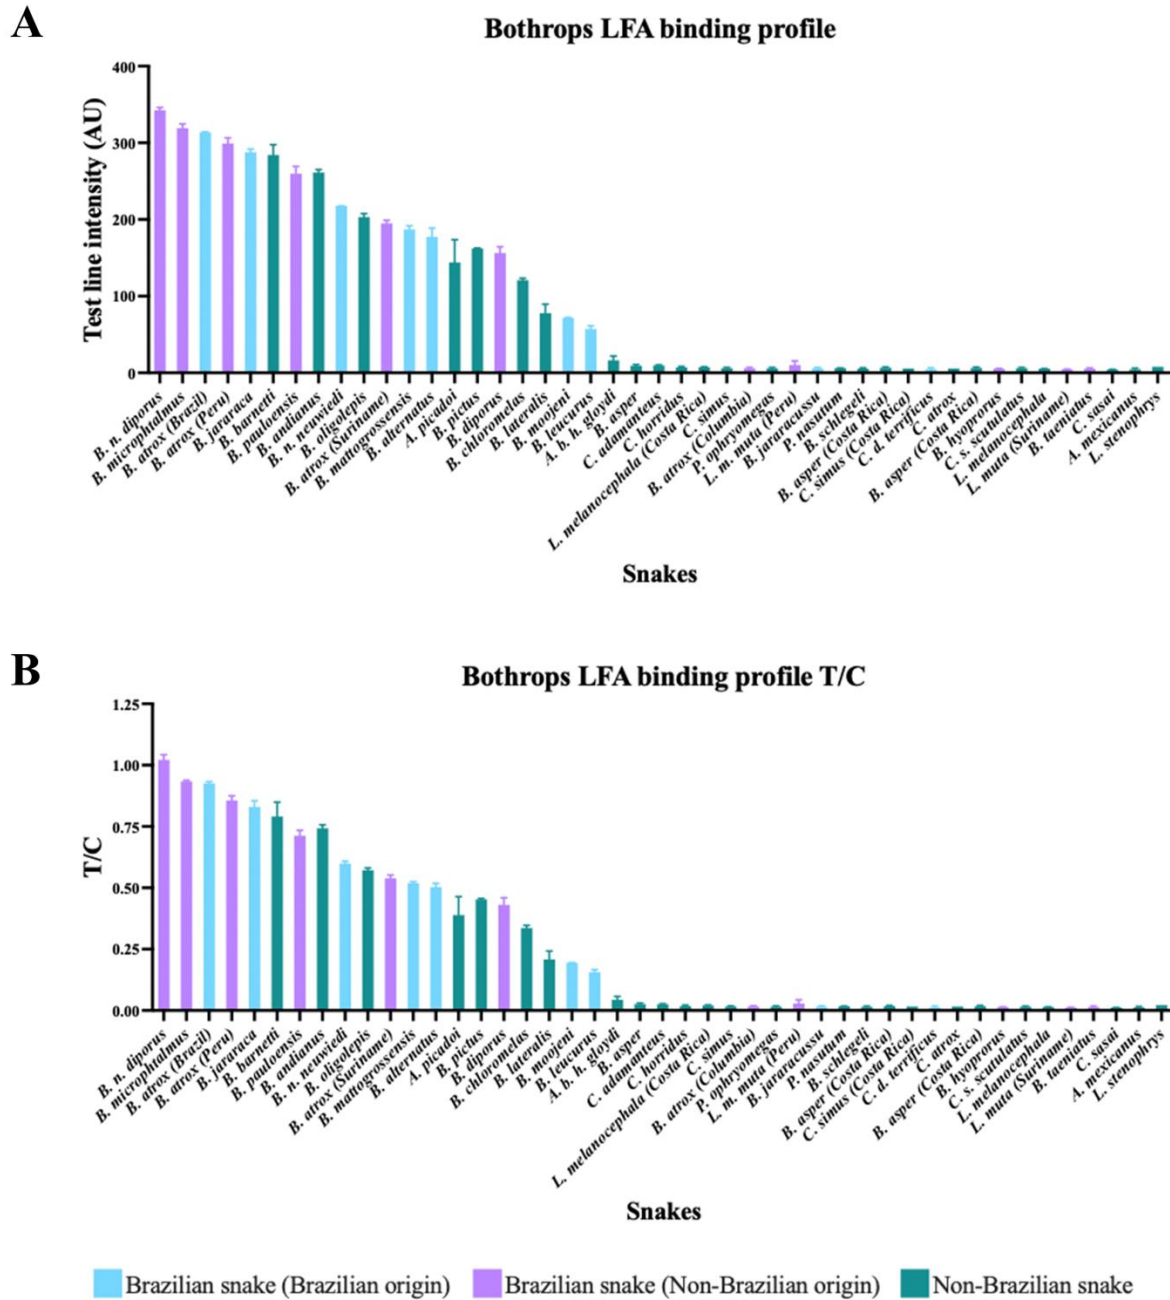

480

481 **Figure 4.** Venom recognition of the sandwich pair 86-14 and 86-11 in LFAs, when tested with

482 1000 ng/mL whole venom dissolved in LFA running buffer. LFA strip signals were quantified

483 with a reader, and the test line signal to control line signal ratio (T/C ratio) is displayed here.

484 Blue indicates that venom from Brazilian snake specimens were used. Purple indicates that the

485 snake species is found in Brazil, but that the venom was extracted from a non-Brazilian

486 specimen or that the origin of the specimen is unknown. Green indicates that the species is not

487 found in Brazil.

488

489 Generally, LFAs are compatible with several different sample matrices. However, this requires  
490 careful optimisation to prevent matrix effects/false positives. To evaluate the effect of different  
491 sample matrices on venom detection by our antibodies, we spiked pooled human urine samples,  
492 pooled human serum samples, pooled human plasma (containing heparin) samples, and pooled  
493 human plasma (containing EDTA) samples with various amounts of *B. atrox* venom and  
494 detected the venom using both ELISAs and LFAs (**Figure 5** and **Error! Reference source not**  
495 **found.**). The results in urine were comparable to the results in running buffer, both in terms of  
496 the low occurrence of false positives on negative tests and high signals on positive tests. In  
497 LFAs, the serum samples generally elicited lower signal intensities than the other types of  
498 samples. Plasma samples with heparin had the highest signals on negative LFAs and medium  
499 signals on positive control LFAs.

500

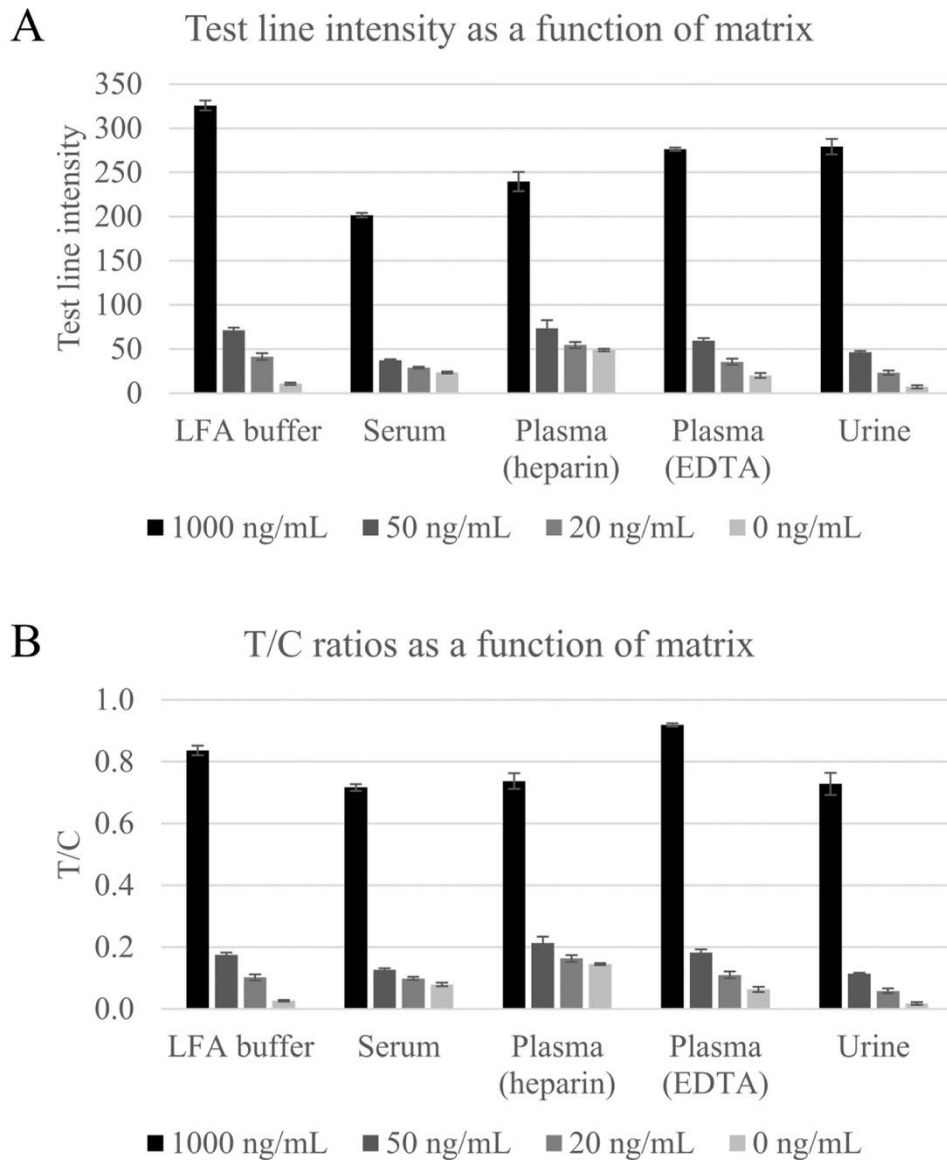

501

502 **Figure 5.** Comparison of matrix effects in LFAs. *B. atrox* venom was diluted in LFA running  
503 buffer, pooled human serum, pooled human plasma (containing heparin), pooled human  
504 plasma (containing EDTA), and pooled human urine. The antigen in the dilution series were  
505 detected with the LFA, and the test line intensities A) and T/C ratios B) are displayed here. The  
506 results shown are the averages of triplicates.

507

508 To assess whether compounds that might be found in human sample matrices could cause false  
509 positives in the LFA, serum and urine samples were spiked with a series of compounds (the



510 individual concentrations of which can be seen in **SI S2**) and tested with LFAs in the absence  
511 of antigen. Additionally, the influence of sample pH on the presence of false positives was  
512 assessed. The results of the experiment can be seen in **Figure 6**. Urine samples generally  
513 yielded lower test line signals and higher control line signals than serum samples. The only  
514 tested compounds to cause false positives were glycine and heparin, and the only conditions to  
515 cause false positives were pHs 4.0, 5.0, and 5.5, and in all cases these false positives only  
516 occurred when tested in serum, indicating that serum causes matrix effects for the reported  
517 LFA.  
518

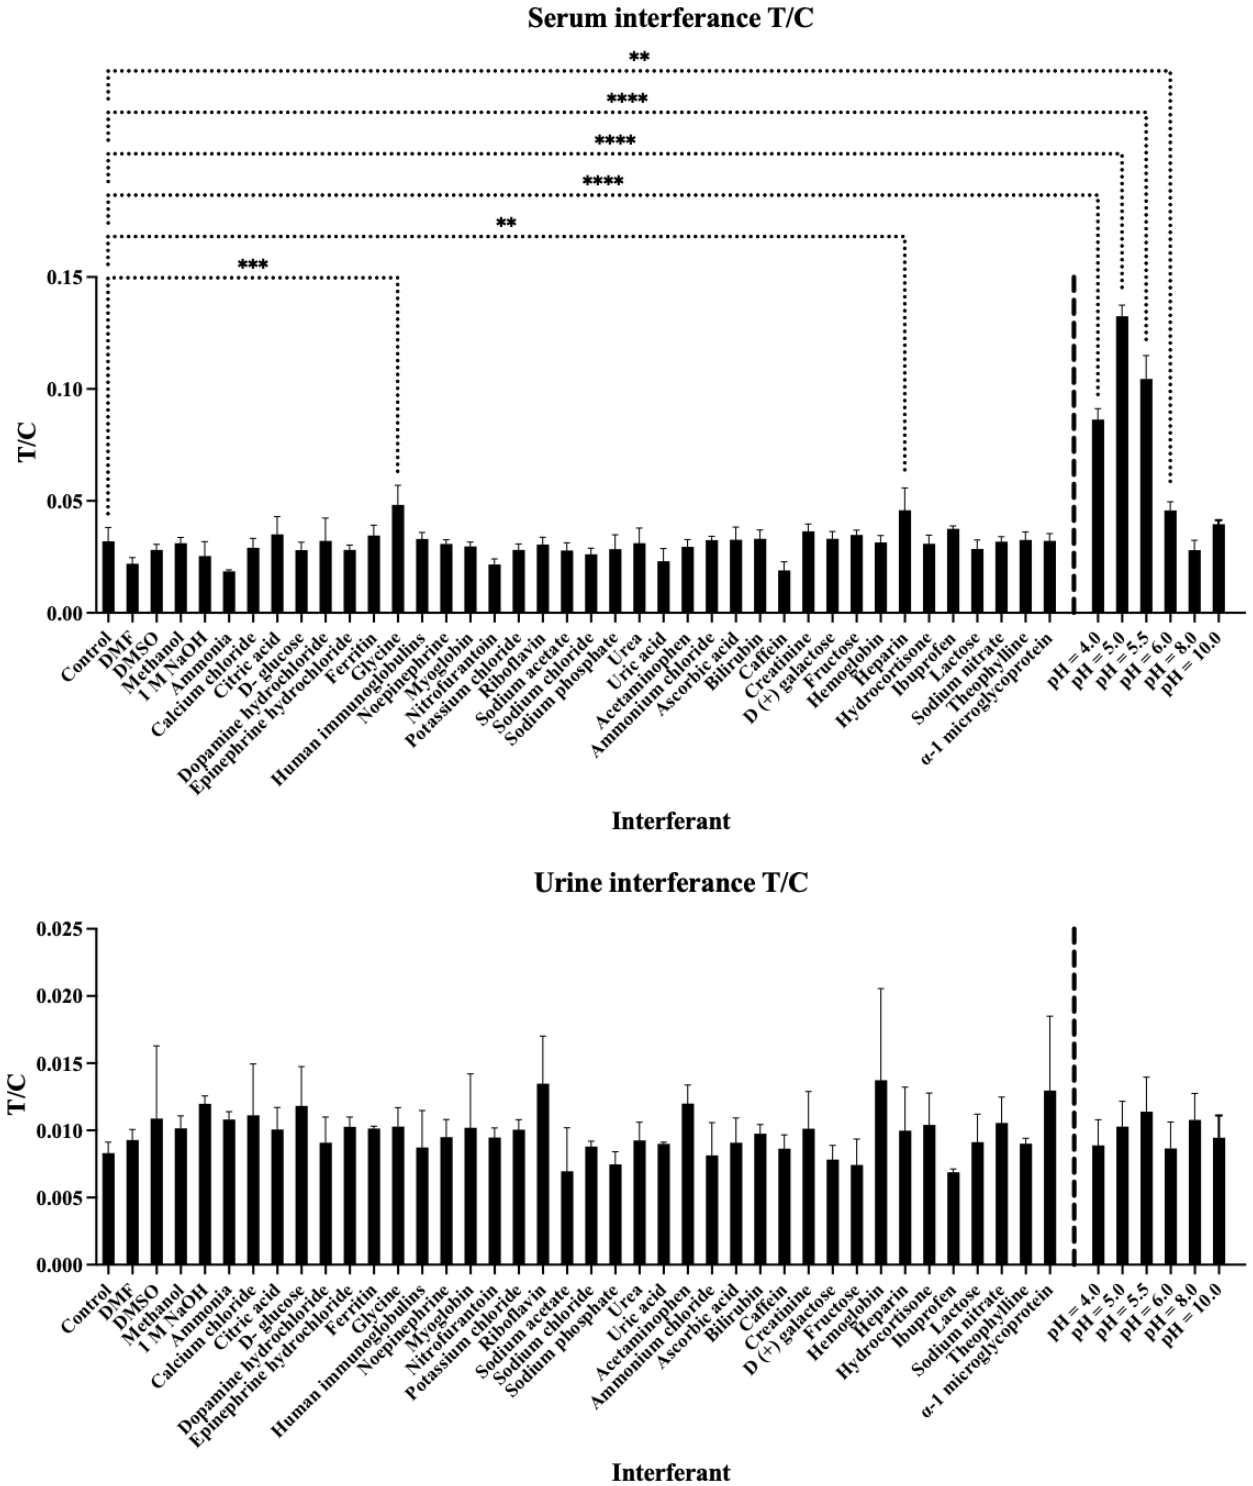

519

520 **Figure 6.** Screening of potential interferants in LFAs. Serum and urine samples were spiked  
 521 with different compounds and tested in LFAs in the absence of antigen to investigate whether  
 522 the compounds could cause false positives. In addition, the solvents (water, DMF, DMSO, and

523 *methanol) used for dissolving the compounds were tested. Serum and urine at their natural*  
524 *pHs, and pH-adjusted serum and urine samples were also tested.*

525

### 526 **3.5 Assay stability**

527

528 It was observed that the conjugated antibodies were not stable at room temperature for extended

529 periods of time (data not shown). This could decrease the utility of the assay intended for use

530 in the tropics. To mitigate this thermal instability of the conjugated antibodies, it was decided

531 to lyophilise them, and store them at 4 °C until use, at which point they were reconstituted in

532 the running buffer and the sample to be tested. The antibodies were lyophilised in six different

533 solutions, consisting of either bovine serum albumin (BSA) or casein as blocking agents, and

534 with either trehalose, sucrose, or mannitol as stabilising agents. The lyophilised antibodies were

535 then used to run LFAs in which a dilution curve of venom was tested. It was determined that

536 the solutions blocked with casein and stabilised with either trehalose or sucrose, respectively,

537 yielded the best results, as no false positives were observed in negative samples, while a

538 comparatively strong test line signal was retained in positive samples (data not shown).

539 Conjugated antibodies lyophilised in the casein-trehalose and casein-sucrose solutions were

540 tested further: The lyophilised antibodies were stored at -20 °C, 4 °C, room temperature

541 (roughly 22 °C), and 37 °C; and tested either immediately after lyophilisation, after one week,

542 two weeks, four weeks, and eight weeks, on venom concentrations of 500 ng/mL and 0 ng/mL.

543 For the 500 ng/mL LFAs, a decrease in test line intensity occurred within the first two weeks,

544 after which the signal stabilised (**Figure 7**). The LFAs run with antibodies lyophilised in the

545 sucrose solution had slightly higher test line intensities at week eight than the LFAs run with

546 antibodies lyophilised in the trehalose solution (**Figure 7**). Taken together, these results

547 indicate that it is possible to extend the shelf-life of the conjugated antibodies by lyophilising

548 them, thereby potentially extending the shelf-life and overall utility of the LFA.

549

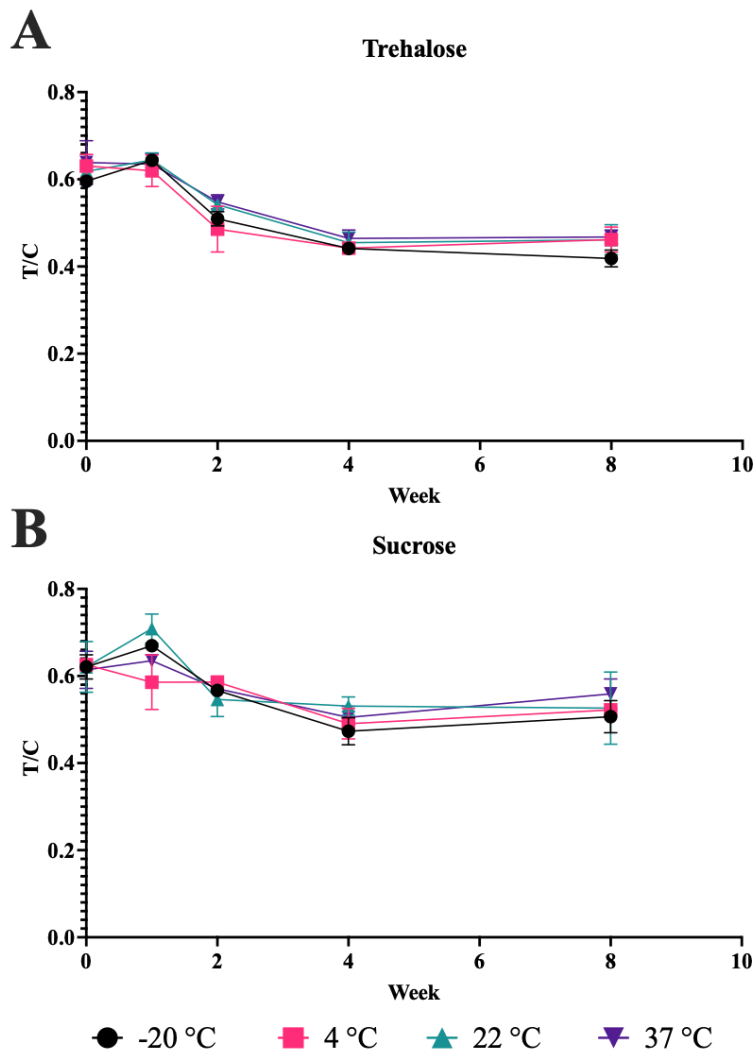

550

551 **Figure 7.** *T/C ratios of LFAs utilising lyophilised antibodies stored under different conditions*  
552 *to detect 500 ng/mL whole venom from B. atrox. The gold-conjugated and biotinylated*  
553 *antibodies were lyophilised in solutions containing either A) trehalose or B) sucrose. The*  
554 *lyophilised reagents were then stored at either -20 °C, 4 °C, 22 °C, or 37 °C for between 0 and*  
555 *8 weeks, before being used in LFAs to detect 500 ng/mL B. atrox venom dissolved in LFA*  
556 *running buffer.*

## 557 **4 Discussion**

558

559 The LFA prototype presented here is the first report of the use of monoclonal antibodies in an  
560 LFA to detect *Bothrops* venom. The LoD of the prototype, when read with a reader, was 8.0

561 ng/mL in serum samples and 9.5 ng/mL in urine samples, with a visual LoD of approximately  
562 25 ng/mL in buffer. This LoD would possibly be sufficient to detect venom in most patient  
563 samples, as a literature study found that reported venom concentrations in patient samples  
564 across species varied from < 1 ng/mL to > 1000 ng/mL, and that venom concentrations were  
565 generally higher after bites caused by vipers than after bites caused by elapids [27]. Two case  
566 studies of patients with bothropic envenomings revealed serum venom concentrations of 33.7  
567 ng/mL and 62.6 ng/mL five hours post-bite, respectively, well above the LoDs reported here  
568 [23,24]. However, it is unknown whether these venom concentrations are representative of  
569 average bothropic envenomings. Generally, venom concentrations in patient samples are  
570 expected to vary depending on the sample matrix (e.g., urine or serum), time since the bite  
571 occurred, the body size of the patient, and other parameters. If the LoD of the prototype proves  
572 to be too high to detect venom in a certain sample type or at a certain time (e.g., in a urine  
573 sample immediately after the bite), it might be possible to improve the LoD by enriching the  
574 venom from the sample, or alternatively to measure another sample type (e.g., a wound swab  
575 or serum sample) [28,29]. Conversely, if the antigen concentration in the sample is high enough  
576 to bring the assay into the hook effect range, it might be possible to dilute the sample.

577         One limitation of this study is that the LFA was not evaluated on real patient samples.  
578 Therefore, it remains to be seen to what extent the LFA is capable of detecting venom in real  
579 samples and whether any untested compounds interfere and cause false positives or false  
580 negatives. Two compounds that could potentially cause issues are antivenom and biotin.  
581 Antivenom is often added to snakebite patient blood samples to prevent clotting, and it is likely  
582 that the polyvalent antivenom antibodies can block the epitopes recognised by the monoclonal  
583 antibodies employed in the LFA. This potential issue might be alleviated by measuring serum  
584 or plasma samples derived from blood samples collected before antivenom administration or  
585 by using different sample types. As for biotin, it has recently been suggested that

586 overconsumption of biotin by the general population might lead to elevated biotin levels in  
587 plasma, which could potentially interfere with immunoassays relying on biotin-binding, such  
588 as the gRAD [30].

589 A study showed that 4.24% of snakebite victims in Brazil received two or more kinds  
590 of antivenom, and that 10.5% of patients bitten by *Bothrops* spp. received polyvalent  
591 antivenom [31]. Administration of polyvalent or multiple antivenoms might indicate a lack of  
592 confidence in the identification of the type of snakes involved in snakebite accidents. This  
593 notion could be supported by another study of 1063 snakebites in Brazil, in which it was found  
594 that only 44% of snakebites were identified at the genus level [32]. Lack of confidence in the  
595 identification of the snake involved in an accident is potentially problematic, as it has been  
596 demonstrated that a delay in treatment, either due to insufficient or incorrect administration of  
597 antivenom, for *Crotalus* bites in Brazil led to an increased risk of acute renal failure for the  
598 patients [13]. Additionally, it has been argued that there is a systematic lack of training of  
599 healthcare professionals in clinical snakebite management in certain states in Brazil [33,34].  
600 Thus, snakebite diagnostic tools could potentially help mitigate the risk of inappropriate  
601 antivenom administration and promote the use of monovalent antivenoms, especially in cases  
602 where the treating personnel is not trained in clinical snakebite management. In the future, the  
603 LFA might also be used to confirm envenoming prior to administration of upcoming first-line-  
604 of-defence drugs, if drug candidates such as varespladib and marimastat are approved for  
605 treatment of snakebite envenoming [35]. This could in turn improve patient outcome even  
606 further.

607  
608 Taken together, the data presented here constitute a proof-of-concept for a rapid diagnostic test  
609 for *Bothrops* envenomings. Potentially, a diagnostic tool, such as the LFA presented here, could  
610 be used to confirm or disprove suspected *Bothrops* envenomings, thereby guiding the choice

611 of antivenom not only for the 10.5% of patients with bothropic bites who receive polyvalent  
612 antivenom but also for the 34.4% of patients with crotalic bites who receive either bothropic  
613 or bothro-crotalic antivenom [31].

614

## 615 **5 Conclusions**

616

617 Here, we have presented a prototype LFA capable of distinguishing the venoms of several  
618 *Bothrops spp.* from the venoms of non-*Bothrops spp.* The LFA had an LoD of 8 ng/mL in  
619 serum and 9.5 ng/mL in urine, when read with a commercial reader, and a visual LoD below  
620 25 ng/mL. In future studies, we plan to further improve the LFA's sensitivity, prior to  
621 evaluating its performance on patient samples. It is possible that the LFA could empower  
622 healthcare providers who have limited or no experience in clinical snakebite management to  
623 diagnose snakebite victims more confidently. This might be especially valuable in remote  
624 clinics and as a support to ongoing efforts to decentralise antivenom in the Brazilian Amazon,  
625 thereby bringing treatment closer to those who need it most and ameliorating the burden of the  
626 highly neglected disease of snakebite envenoming.

627

## 628 **6 Acknowledgments**

629

630 The authors would like to thank Prof. Bruno Lomonte of Instituto Clodomiro Picado at  
631 Universidad de Costa Rica, Dr.s Alfonso Zavaleta and Maria Salas of Cayetano Heredia  
632 University, and Dr. Soledad Bustillo of Universidad Nacional del Nordeste for their kind  
633 donations of lyophilised venoms. The authors would also like to thank Prof. Ana Moura da  
634 Silva of Instituto Butantan, Profs. Wuelton Monteiro, Marco Sartim, and Lisele Brasileiro of

635 Amazonas State University, and Prof. Manuela Pucca of the Federal University of Roraima for  
636 good scientific discussions.

637

## 638 **Funding**

639 This work was supported by Innovation Fund Denmark [grant number 9065-00007B].

640

## 641 **Author contributions**

642

643 CK, AHL, JAJ, SHD, AMH, and RUWF conceived the study. CK, SHD, AMH, RUWF, PDK,  
644 SBB, JAH, and IO carried out the experiments and analysed the data. CK, JAJ, IO, and JAH  
645 drafted the manuscript. All authors revised and reviewed the manuscript.

646

## 647 **References**

648

- 649 [1] J.M. Gutiérrez, J.J. Calvete, A.G. Habib, R.A. Harrison, D.J. Williams, D.A. Warrell,  
650 Snakebite envenoming, *Nat Rev Dis Primers*. 3 (2017) 17063.  
651 <https://doi.org/10.1038/nrdp.2017.63>.
- 652 [2] World Health Organization, Recommendation for the Adoption of an Additional  
653 Disease as a Neglected Tropical Disease: The case for snakebite envenoming, 2017.
- 654 [3] Secretaria De Vigilância em Saúde - Ministério da Saúde, Boletim Epidemiológico:  
655 Vigilância epidemiológica do sarampo no Brasil 2020: Semana Epidemiológica, 2020.
- 656 [4] R. Bochner, J.T. Fizon, C. Machado, A Profile of Snake Bites in Brazil, 2001 to 2012,  
657 *J Clin Toxicol*. 04 (2014). <https://doi.org/10.4172/2161-0495.1000194>.
- 658 [5] M.C. Schneider, K.D. Min, P.N. Hamrick, L.R. Montebello, T.M. Ranieri, L. Mardini,  
659 V.M. Camara, R.R. Luiz, B. Liese, M. Vuckovic, M.O. Moraes, N.T. Lima, Overview  
660 of snakebite in brazil: Possible drivers and a tool for risk mapping, *PLoS Negl Trop*  
661 *Dis*. 15 (2021) 1–18. <https://doi.org/10.1371/journal.pntd.0009044>.
- 662 [6] C. Knudsen, J.A. Jürgensen, S. Føns, A.M. Haack, R.U.W. Friis, S.H. Dam, S.P. Bush,  
663 J. White, A.H. Laustsen, Snakebite Envenoming Diagnosis and Diagnostics, *Front*  
664 *Immunol*. 12 (2021). <https://doi.org/10.3389/fimmu.2021.661457>.
- 665 [7] M.B. Pucca, C. Knudsen, I.S. Oliveira, C. Rimbault, F.A. Cerni, F.H. Wen, J. Sachett,  
666 M.A. Sartim, A.H. Laustsen, W.M. Monteiro, Current Knowledge on Snake Dry Bites,  
667 *Toxins (Basel)*. 12 (2020) 4–7. <https://doi.org/10.3390/toxins12110668>.



- 668 [8] W.M. Monteiro, J.C. Contreras-Bernal, P.F. Bisneto, J. Sachett, I. Mendonça da Silva,  
669 M. Lacerda, A. Guimarães da Costa, F. Val, L. Brasileiro, M.A. Sartim, S. Silva-de-  
670 Oliveira, P.S. Bernarde, I.L. Kaefer, F.G. Graziotin, F.H. Wen, A.M. Moura-da-Silva,  
671 *Bothrops atrox*, the most important snake involved in human envenomings in the  
672 amazon: How venomics contributes to the knowledge of snake biology and clinical  
673 toxinology, *Toxicon X.* 6 (2020). <https://doi.org/10.1016/j.toxcx.2020.100037>.
- 674 [9] M. Hamza, C. Knudsen, C.A. Gnanathasan, W.M. Monteiro, M.R. Lewin, A.H.  
675 Laustsen, A.G. Habib, Clinical management of snakebite envenoming: Future  
676 perspectives, *Toxicon X.* 11 (2021) 100079.  
677 <https://doi.org/10.1016/j.toxcx.2021.100079>.
- 678 [10] C.I. Johnston, N.M. Ryan, M.A. O’Leary, S.G.A. Brown, G.K. Isbister, Australian  
679 taipan (*Oxyuranus* spp.) envenoming: clinical effects and potential benefits of early  
680 antivenom therapy—Australian Snakebite Project (ASP-25), *Clin Toxicol.* 55 (2017)  
681 115–122. <https://doi.org/10.1080/15563650.2016.1250903>.
- 682 [11] V.E. Anderson, C.J. Gerardo, M. Rapp-Olsson, S.P. Bush, M.E. Mullins, S. Greene,  
683 E.A. Toschlog, E. Quackenbush, S.R. Rose, R.B. Schwartz, N.P. Charlton, B. Lewis,  
684 K.C. Kleinschmidt, K. Sharma, E.J. Lavonas, Early administration of Fab antivenom  
685 resulted in faster limb recovery in copperhead snake envenomation patients, *Clin*  
686 *Toxicol.* 0 (2018) 1–6. <https://doi.org/10.1080/15563650.2018.1491982>.
- 687 [12] S. Alfred, D. Bates, J. White, M.A. Mahmood, D.A. Warrell, K.T. Thwin, M.M.  
688 Thein, S.S. Sint San, Y.L. Myint, H.K. Swe, K.M. Kyaw, A. Zaw, C.A. Peh, Acute  
689 Kidney Injury Following Eastern Russell’s Viper (*Daboia siamensis*) Snakebite in  
690 Myanmar, *Kidney Int Rep.* 4 (2019) 1337–1341.  
691 <https://doi.org/10.1016/j.ekir.2019.05.017>.
- 692 [13] F.M.O. Pinho, D.M.T. Zanetta, E.A. Burdmann, Acute renal failure after *Crotalus*  
693 *durissus* snakebite: A prospective survey on 100 patients, *Kidney Int.* 67 (2005) 659–  
694 667. <https://doi.org/10.1111/j.1523-1755.2005.67122.x>.
- 695 [14] Y.F. Mise, R. Lira-da-Silva, F.M. Carvalho, Time to treatment and severity of snake  
696 envenoming in Brazil, *Revista Panamericana de Salud Pública.* 42 (2018) e52.  
697 <https://doi.org/10.26633/RPSP.2018.52>.
- 698 [15] W.M. Monteiro, A.S. de Farias, F. Val, A.V.S. Neto, A. Sachett, M. Lacerda, V.  
699 Sampaio, D. Cardoso, L. Garnelo, J.R.N. Vissoci, J. Sachett, F.H. Wen, Providing  
700 Antivenom Treatment Access to All Brazilian Amazon Indigenous Areas: “Every Life  
701 Has Equal Value,” *Toxins (Basel).* 12 (2020). <https://doi.org/10.3390/toxins12120772>.
- 702 [16] A.K. Yetisen, M.S. Akram, C.R. Lowe, Paper-based microfluidic point-of-care  
703 diagnostic devices, *Lab Chip.* 13 (2013) 2210–2251.  
704 <https://doi.org/10.1039/c3lc50169h>.
- 705 [17] L.F. Chaves, T.-W. Chuang, M. Sasa, J.M. Gutiérrez, Snakebites are associated with  
706 poverty, weather fluctuations, and El Niño, *Sci Adv.* 1 (2015) e1500249–e1500249.  
707 <https://doi.org/10.1126/sciadv.1500249>.
- 708 [18] R.A. Harrison, A. Hargreaves, S.C. Wagstaff, B. Faragher, D.G. Lalloo, Snake  
709 Envenoming: A disease of poverty, *PLoS Negl Trop Dis.* 3 (2009) e569.  
710 <https://doi.org/10.1371/journal.pntd.0000569>.
- 711 [19] H.S. Bawaskar, P.H. Bawaskar, P.H. Bawaskar, Snake bite in India: a neglected  
712 disease of poverty, *The Lancet.* 390 (2017) 1947–1948. [https://doi.org/10.1016/S0140-6736\(17\)32175-X](https://doi.org/10.1016/S0140-6736(17)32175-X).
- 714 [20] C.R. Wang, E.R. Bubner, B. Jovcevski, P. Mittal, T.L. Pukala, Interrogating the higher  
715 order structures of snake venom proteins using an integrated mass spectrometric  
716 approach, *J Proteomics.* 216 (2020) 103680.  
717 <https://doi.org/10.1016/j.jprot.2020.103680>.

- 718 [21] J.A. Harrison, J.A. Aquilina, Insights into the subunit arrangement and diversity of  
719 paradoxin and taipoxin, *Toxicon*. 112 (2016) 45–50.  
720 <https://doi.org/10.1016/j.toxicon.2016.01.054>.
- 721 [22] N.R. Caterer, Patent number: WO 2009/062506 A1 - Methods of quantification for  
722 lateral flow devices, 2009.
- 723 [23] F. Bucarechi, E.M. de Capitani, S. Hyslop, S.M. Mello, P.R. Madureira, V. Zanardi,  
724 D.M. Ferreira, G. v. Meirelles, L.C.R. Fernandes, Compartment syndrome after  
725 Bothrops jararaca snakebite: Monitoring, treatment, and outcome, *Clin Toxicol*. 48  
726 (2010) 57–60. <https://doi.org/10.3109/15563650903356201>.
- 727 [24] F. Bucarechi, S. Hyslop, S.M. Mello, R.J. Vieira, Bothrops snakebite on the head:  
728 Case report and review of the literature, *Ann Trop Med Parasitol*. 101 (2007) 733–743.  
729 <https://doi.org/10.1179/136485907X241370>.
- 730 [25] G.M.S. Ross, D. Filippini, M.W.F. Nielen, G.I.J. Salentijn, Unraveling the Hook  
731 Effect: A Comprehensive Study of High Antigen Concentration Effects in Sandwich  
732 Lateral Flow Immunoassays, *Anal Chem*. (2020).  
733 <https://doi.org/10.1021/acs.analchem.0c03740>.
- 734 [26] F. Allegrini, A.C. Olivieri, IUPAC-consistent approach to the limit of detection in  
735 partial least-squares calibration, *Anal Chem*. 86 (2014) 7858–7866.  
736 <https://doi.org/10.1021/ac501786u>.
- 737 [27] S. Sanhajariya, S.B. Duffull, G.K. Isbister, Pharmacokinetics of snake venom, *Toxins*  
738 (Basel). 10 (2018) 73. <https://doi.org/10.3390/toxins10020073>.
- 739 [28] C.C. Liu, Y.H. Yang, Y.C. Hsiao, P.J. Wang, J.C. Liu, C.H. Liu, W.C. Hsieh, C.C.  
740 Lin, J.S. Yu, Rapid and Efficient Enrichment of Snake Venoms from Human Plasma  
741 Using a Strong Cation Exchange Tip Column to Improve Snakebite Diagnosis, *Toxins*  
742 (Basel). 13 (2021). <https://doi.org/10.3390/toxins13020140>.
- 743 [29] Y. Zhang, X. Liu, L. Wang, H. Yang, X. Zhang, C. Zhu, W. Wang, L. Yan, B. Li,  
744 Improvement in Detection Limit for Lateral Flow Assay of Biomacromolecules by  
745 Test-Zone Pre-enrichment, *Sci Rep*. 10 (2020) 9604. <https://doi.org/10.1038/s41598-020-66456-1>.
- 746 [30] J.H.T. Luong, S.K. Vashist, Chemistry of Biotin-Streptavidin and the Growing  
747 Concern of an Emerging Biotin Interference in Clinical Immunoassays, *ACS Omega*. 5  
748 (2020) 10–18. <https://doi.org/10.1021/acsomega.9b03013>.
- 750 [31] S.F.V. Magalhães, H.M. Peixoto, N. Moura, W.M. Monteiro, M.R.F. De Oliveira,  
751 Snakebite envenomation in the Brazilian Amazon: A descriptive study, *Trans R Soc*  
752 *Trop Med Hyg*. 113 (2019) 143–151. <https://doi.org/10.1093/trstmh/try121>.
- 753 [32] P.L.M.M. Albuquerque, G.B. Silva Junior, C.N. Jacinto, C.B. Lima, J.B. Lima, M. do  
754 S.B. Veras, E.F. Daher, Epidemiological Profile of Snakebite Accidents in a  
755 Metropolitan Area of Northeast Brazil, *Rev Inst Med Trop Sao Paulo*. 55 (2013) 347–  
756 351. <https://doi.org/10.1590/S0036-46652013000500009>.
- 757 [33] F. Hui Wen, W.M. Monteiro, A.M. Moura-da-Silva, D. V. Tambourgi, I. Mendonça da  
758 Silva, V.S. Sampaio, M.C. dos Santos, J. Sachett, L.C.L. Ferreira, J. Kalil, M. Lacerda,  
759 Snakebites and Scorpion Stings in the Brazilian Amazon: Identifying Research  
760 Priorities for a Largely Neglected Problem, *PLoS Negl Trop Dis*. 9 (2015) e0003701.  
761 <https://doi.org/10.1371/journal.pntd.0003701>.
- 762 [34] S.S. de Oliveira, V. de Souza Sampaio, J. de Almeida Gonçalves Sachett, E. Campos  
763 Alves, V.C. da Silva, J.A. Alcântara de Lima, I.M. da Silva, L.C. de Lima Ferreira, P.  
764 Bernarde, H.W. Fan, M.V. Guimarães de Lacerda, W.M. Monteiro, Snakebites in the  
765 Brazilian Amazon: Current Knowledge and Perspectives, in: 2018: pp. 73–99.  
766 [https://doi.org/10.1007/978-94-017-7438-3\\_61](https://doi.org/10.1007/978-94-017-7438-3_61).

- 767 [35] C. Knudsen, A.H. Laustsen, Recent Advances in Next Generation Snakebite  
768 Antivenoms, *Trop Med Infect Dis.* 3 (2018) 42.  
769 <https://doi.org/10.3390/tropicalmed3020042>.  
770  
771

772

773
